# Supplementary material for: SAG/RBX2 E3 ligase complexes with UBCH10 and UBE2S E2s to ubiquitylate β-TrCP1 via K11-linkage for degradation
Source: Sci Rep. 2016 Dec 2;6:37441. doi: 10.1038/srep37441 (PMC5133542; doi:10.1038/srep37441)

**SAG/RBX2 E3 ligase complexes with UBCH10 and UBE2S E2s  
to ubiquitylate  $\beta$ -TrCP1 via K11-linkage for degradation**

**Peng Kuang<sup>1,2</sup>, Mingjia Tan<sup>2</sup>, Weihua Zhou<sup>2</sup>, Qiang Zhang<sup>2</sup>, and Yi Sun<sup>2-4</sup>**

<sup>1</sup>Department of Internal Medicine, Beijing University School of Medicine, 38 Xueyuan Road, Beijing, 100191, China

<sup>2</sup>Division of Radiation and Cancer Biology, Department of Radiation Oncology, University of Michigan, 4424B MS-1, 1301 Catherine Street, Ann Arbor, MI 48109, USA.

<sup>3</sup>Institute of Translational Medicine, Zhejiang University School of Medicine, Hangzhou, Zhejiang, People's Republic of China.

<sup>4</sup>Collaborative Innovation Center for Diagnosis and Treatment of Infectious Diseases, Zhejiang University, Hangzhou, P.R. China;

<sup>#</sup>Corresponding author: email: [sunyi@umich.edu](mailto:sunyi@umich.edu) or [yisun@zju.edu.cn](mailto:yisun@zju.edu.cn)

Running title: SAG ubiquitylates  $\beta$ TrCP for degradation

Key words:  $\beta$ -TrCP, CRL5, RBX1, SAG, UBE2S, and UBCH10

### **Supplemental Figure legends:**

#### **Figure S1. Inverse relationship between SAG and $\beta$ TrCP1, and their binding to cullins.**

(A) Inverse correlation between SAG and  $\beta$ TrCP: Cell lysates were prepared from various lung cancer cell lines, followed by IB using indicated Abs.

(B) SAG- $\beta$ TrCP1-cullins form the complex: The 293T cells were transfected with FLAG-tagged CUL1 or CUL5, followed by IP with anti-FLAG Ab or IgG control, and IB with indicated Abs.

**A**

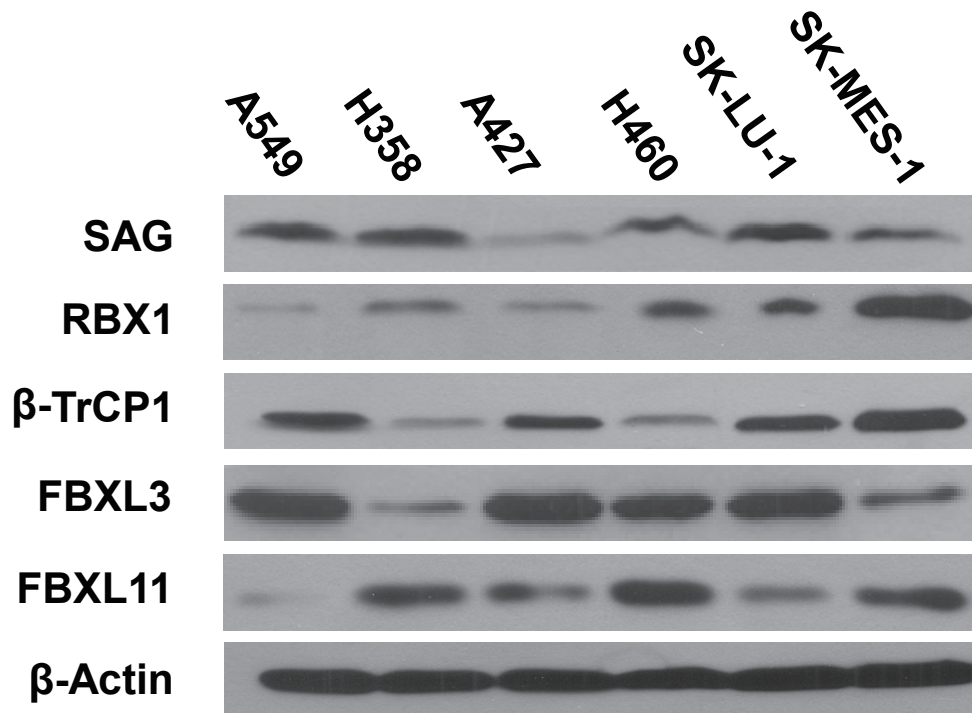

# B

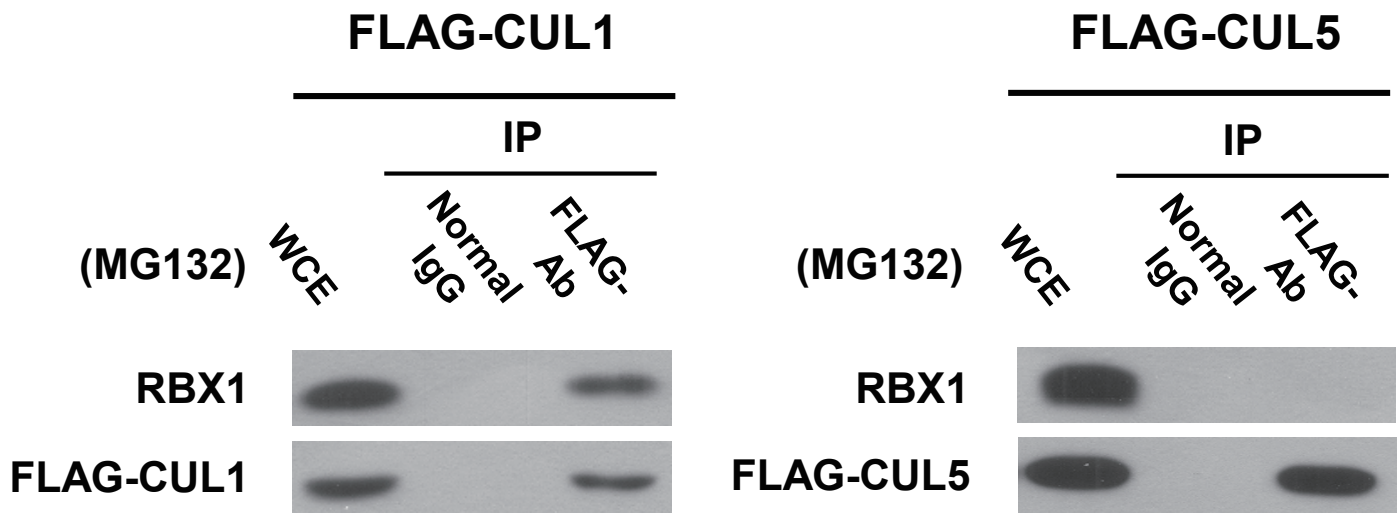

**Figure S2. SAG negatively regulates  $\beta$ -TrCP1 protein level.**

- (A) SAG-CUL5 reduces  $\beta$ TrCP1 level: The 293T cells were transfected with indicated plasmids. Whole cell extracts were analyzed by IB with indicated antibodies. FLAG-1: CUL1 or CUL5; FLAG-2, SAG or RBX1.
- (B&C) Accumulation of  $\beta$ TrCP1 and p27: Two indicated lung cancer lines were treated with various concentrations of MLN4924 for 24 hrs, followed by IB, using indicated Abs.
- (D&E) SAG-CUL5 shortens the half-life of  $\beta$ TrCP1 and  $\beta$ TrCP1 $\Delta$ F: After transfection with indicated plasmids for 12 hrs, cells were switched to fresh medium (10% FBS) containing cycloheximide (CHX) and incubated for indicated time periods before being harvested for IB using indicated Abs.
- (F) Manipulation of SAG-CUL5 has no effect on  $\beta$ -TrCP mRNA level. A427 cells were transfected with indicated plasmid or siRNA oligoes. Forty-eight hrs post-transfection, total RNA was isolated and subjected to RT-PCR analysis for  $\beta$ -TrCP mRNA levels.

**A****293 cells**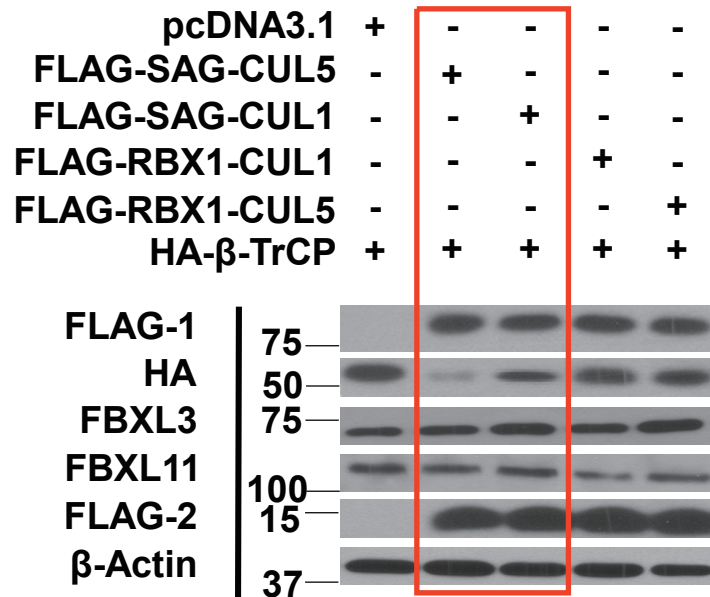**B****A549+MLN4924**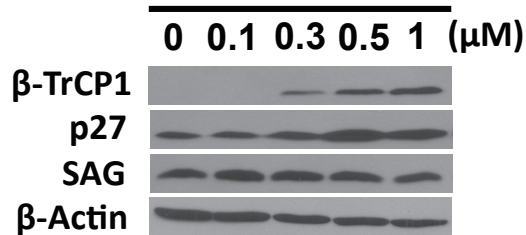**C****H358+MLN4924**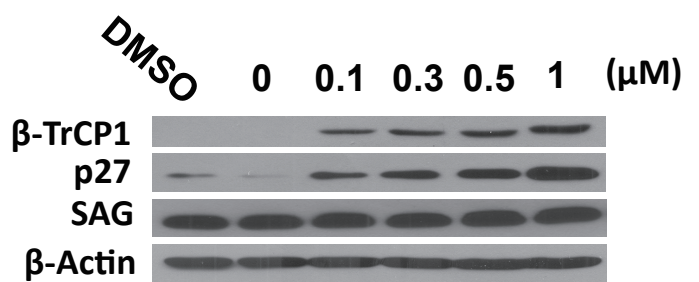**D****293 cells**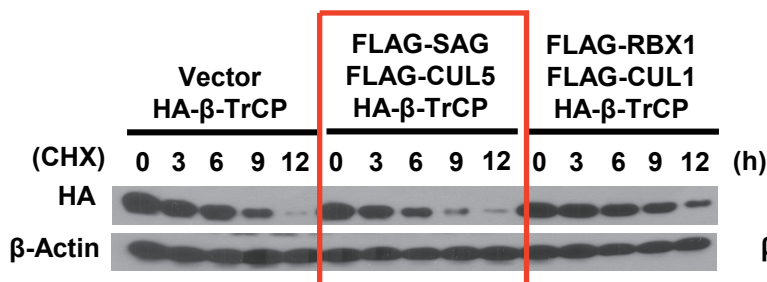**E****293 cells**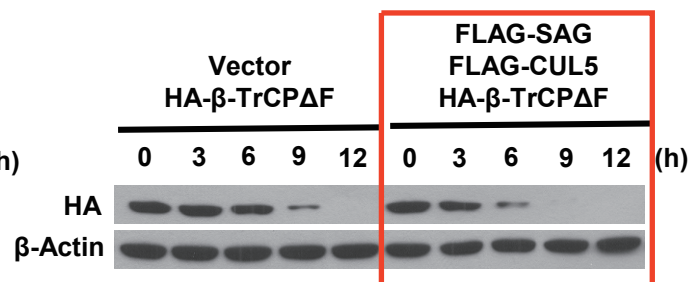**F**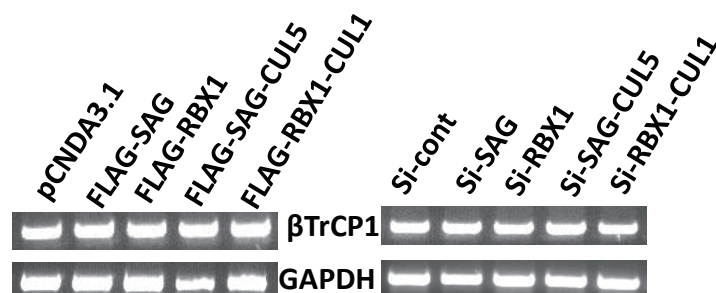

**Figure S3. SAG-CUL5, but not RBX1-CUL1, promotes the ubiquitylation of  $\beta$ TrCP1 via K11 linkage.**

**(A)** SAG-CUL5 promotes polyubiquitylation of  $\beta$ -TrCP1 and  $\beta$ -TrCP1 $\Delta$ F *in vivo*:

H1299 cells were transfected with indicated plasmids, lysed under denatured condition by 6M guanidinium solution, followed by Ni-bead pull-down. Washed beads were boiled and subjected to IB, along with whole cell lysates, using indicated Abs.

**(B-E)** SAG/CUL5 promotes poly-ubiquitylation of  $\beta$ -TrCP1 via K11 linkage: H1299

(B&D) or 293T (C&E) cells were cotransfected with indicated plasmids alone or in combination, along with ubiquitin and various ubiquitin mutants. Whole cell extracts and Ni-NTA affinity purified fractions were analyzed by IB using indicated Abs.

**A****H1299 cells**

|                |   |   |   |   |   |   |   |   |
|----------------|---|---|---|---|---|---|---|---|
| Vector         | + | + | - | - | - | + | - | - |
| FLAG-CUL1-RBX1 | - | - | - | - | + | - | - | + |
| FLAG-CUL5-SAG  | - | - | - | + | - | - | + | - |
| HA-β-TrCp      | - | + | + | + | + | - | - | - |
| HA-β-TrCPΔF    | - | - | - | - | - | + | + | + |
| His-Ub         | + | - | + | + | + | - | + | + |

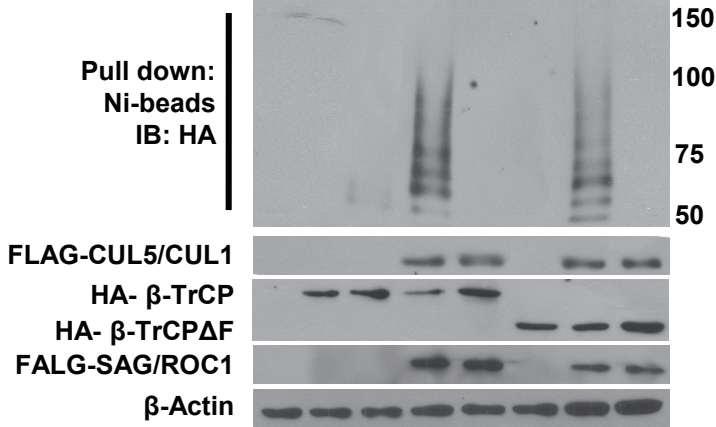**C****H1299 cells**

|               |   |    |    |    |     |     |   |    |    |     |     |
|---------------|---|----|----|----|-----|-----|---|----|----|-----|-----|
| Vector        | + | +  | +  | -  | -   | -   | + | +  | -  | -   | -   |
| FLAG-CUL5-SAG | + | +  | -  | +  | +   | +   | + | -  | +  | +   | +   |
| HA-β-TrCP     | + | -  | +  | +  | +   | +   | - | -  | -  | -   | -   |
| HA-β-TrCPΔF   | - | -  | -  | -  | -   | -   | + | +  | +  | +   | +   |
| His-Ub        | - | WT | WT | WT | K11 | K48 | - | WT | WT | K11 | K48 |

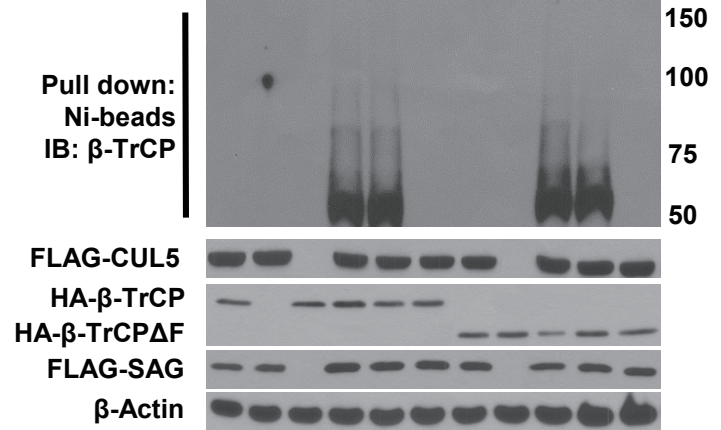**B****293 cells**

|               |   |    |    |    |     |     |     |   |    |    |     |     |        |
|---------------|---|----|----|----|-----|-----|-----|---|----|----|-----|-----|--------|
| Vector        | + | +  | +  | -  | -   | -   | -   | + | +  | -  | -   | -   | -      |
| FLAG-CUL5-SAG | + | +  | -  | +  | +   | +   | +   | + | -  | +  | +   | +   | +      |
| HA-β-TrCP     | + | -  | +  | +  | +   | +   | +   | - | -  | -  | -   | -   | -      |
| HA-β-TrCPΔF   | - | -  | -  | -  | -   | -   | -   | + | +  | +  | +   | +   | +      |
| His-HA-Ub     | - | WT | WT | WT | K11 | K48 | K63 | - | WT | WT | K11 | K48 | K63(R) |

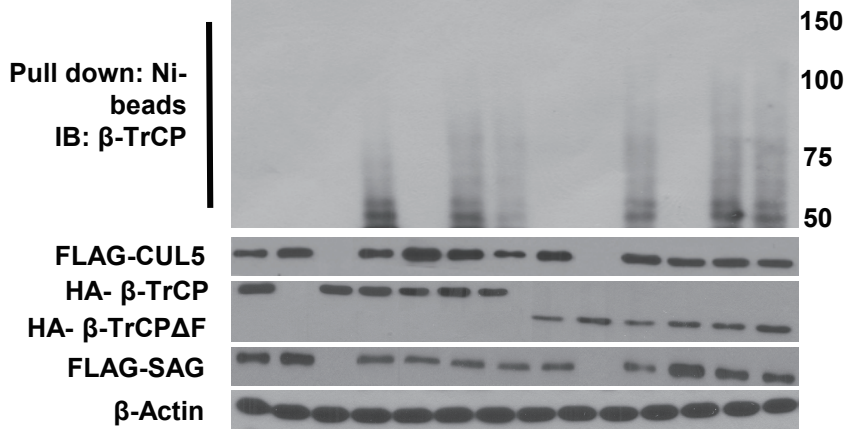**D****H1299 cells**

|               |   |    |    |    |     |     |   |    |    |     |     |
|---------------|---|----|----|----|-----|-----|---|----|----|-----|-----|
| Vector        | + | +  | +  | -  | -   | -   | + | +  | -  | -   | -   |
| FLAG-CUL1-SAG | + | +  | -  | +  | +   | +   | + | -  | +  | +   | +   |
| HA-β-TrCP     | + | -  | +  | +  | +   | +   | - | -  | -  | -   | -   |
| HA-β-TrCPΔF   | - | -  | -  | -  | -   | -   | + | +  | +  | +   | +   |
| His-Ub        | - | WT | WT | WT | K11 | K48 | - | WT | WT | K11 | K48 |

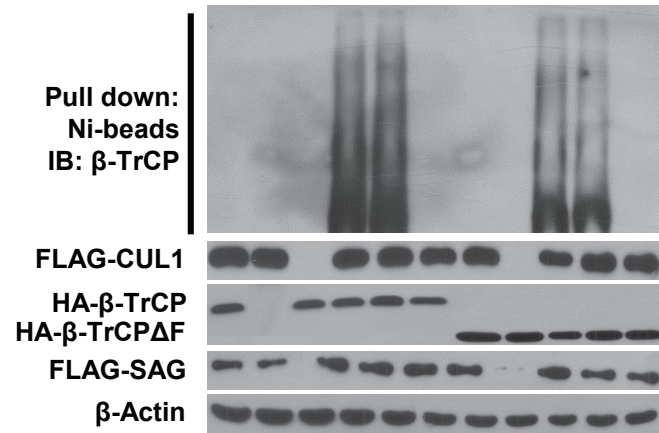**E****293 cells**

|                |   |    |    |    |     |     |   |    |    |    |     |        |
|----------------|---|----|----|----|-----|-----|---|----|----|----|-----|--------|
| Vector         | + | +  | +  | -  | -   | -   | + | +  | +  | -  | -   | -      |
| FLAG-CUL5-SAG  | + | +  | -  | +  | +   | +   | - | -  | -  | -  | -   | -      |
| FLAG-CUL1-RBX1 | - | -  | -  | -  | -   | -   | + | +  | -  | +  | +   | +      |
| P27            | + | -  | +  | +  | +   | +   | + | -  | +  | +  | +   | +      |
| His-Ub         | - | WT | WT | WT | K11 | K48 | - | WT | WT | WT | K11 | K48(R) |

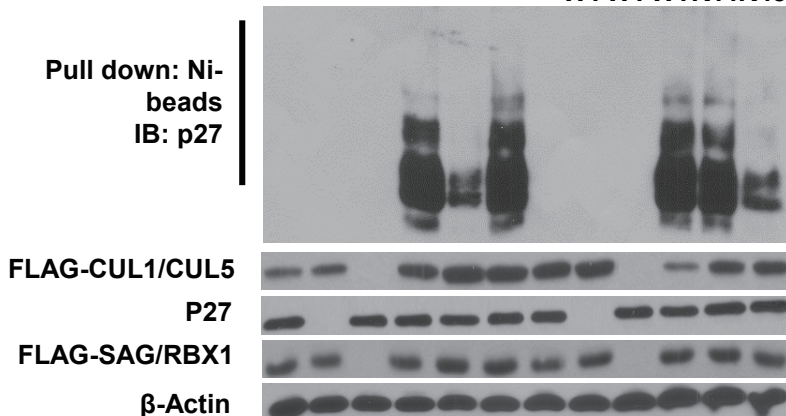

**Figure S4. SAG and RBX1 form the complex with different E2s.**

- (A) H1299 cells were transfected with FLAG-SAG or FLAG-RBX1, followed by IP using FLAG Ab or normal IgG control, and IB with indicated Abs.
- (B&C) Whole cell extracts (WCE) from A427 cells were subjected to IP and IB, or directly subjected to IB with indicated Abs.
- (D) The 293T cells were transfected with indicated plasmids alone or in combination, and subjected to in vitro ubiquitylation as described in M&M. The reaction mixture was then loaded onto PAGE gel for IB using anti-ErbB Ab.

**A**

**H1299 cells**

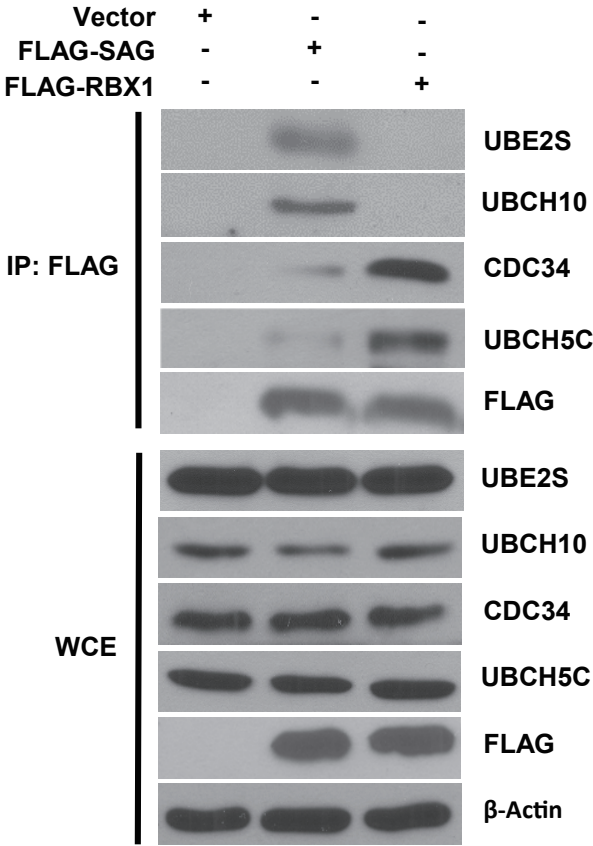

**B**

**A427 cells**

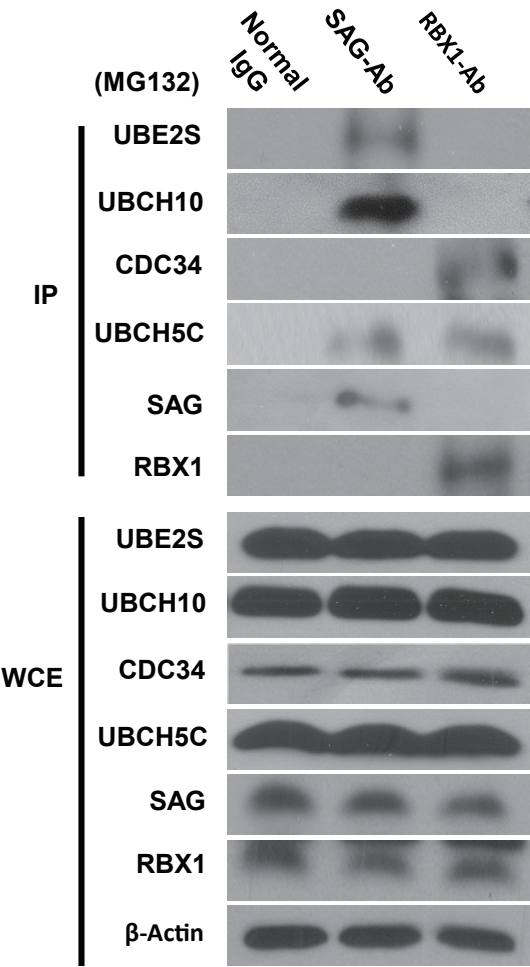

**C**

**A427 cells**

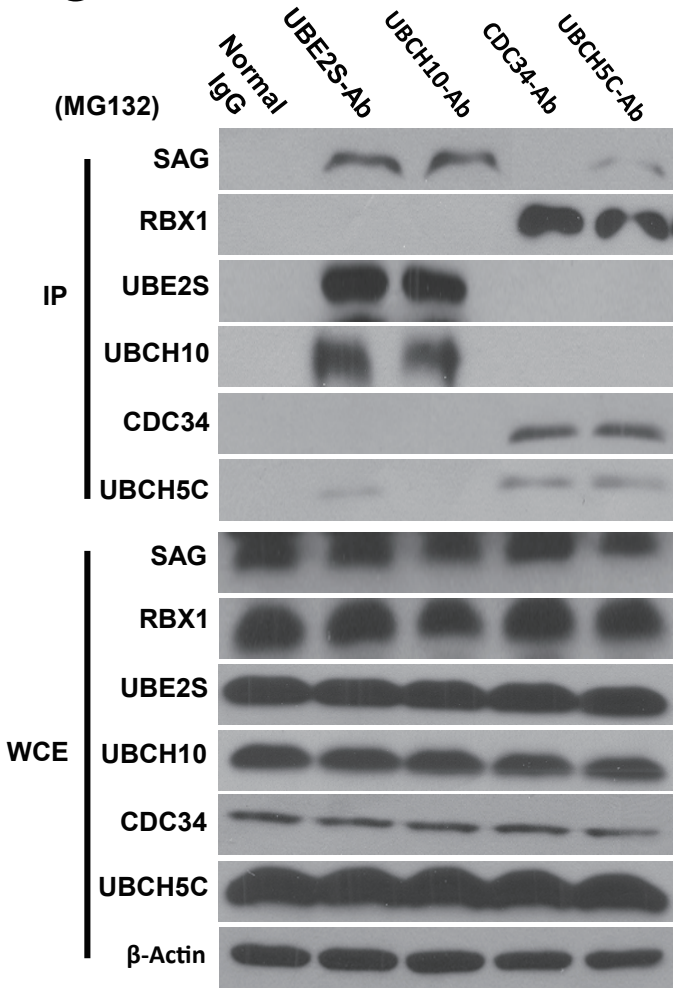

**D**

**293 cells**

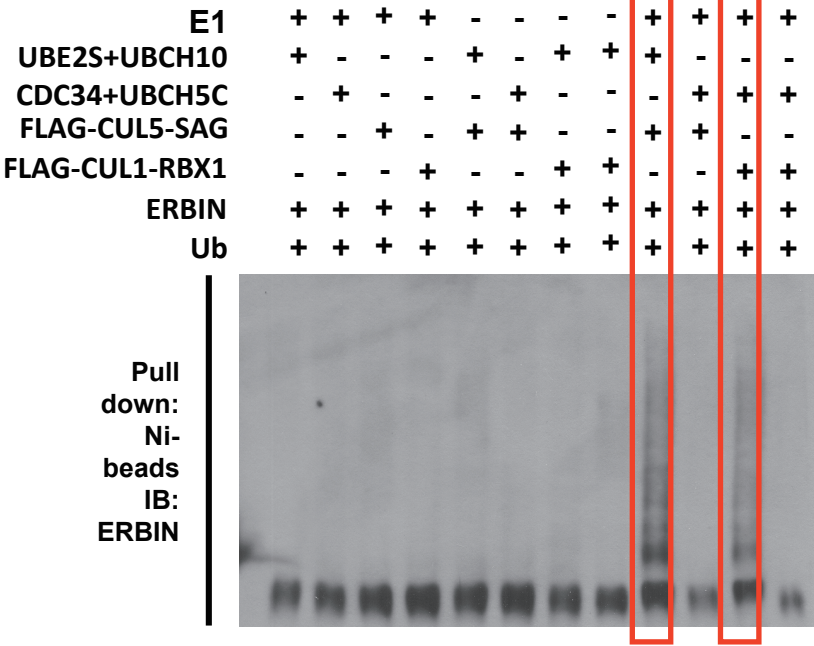

Supplement: Supplementary Materials [file srep37441-s1.pdf]
